# Supplementary material for: Nutritional Composition and Anti-Type 2 Diabetes Mellitus Potential of Femur Bone Extracts from Bovine, Chicken, Sheep, and Goat: Phytochemical and In Vivo Studies
Source: MDPI journal article supplement (doi:10.3390/nu15184037), 2023-09-18
Supplement: s1 [file s1]

# Nutritional Composition and Anti-Type 2 Diabetes Mellitus Potential of Femur Bone Extracts from Bovine, Chicken, Sheep, and Goat: Phytochemical and In Vivo Studies

Naseh A. Algehainy <sup>1</sup>, Esraa M. Mohamed <sup>2</sup>, Hanan F. Aly <sup>3</sup>, Eman A. Younis <sup>3</sup>, Faisal H. Altemani <sup>1</sup>, Mohammad A. Alanazi <sup>1</sup>, Gerhard Bringmann <sup>4,\*</sup>, Usama Ramadan Abdelmohsen <sup>5,\*</sup> and Abeer H. Elmaidomy <sup>6</sup>

<sup>1</sup> Department of Medical Laboratory Technology, Faculty of Applied Medical Sciences, University of Tabuk, Tabuk 71491, Saudi Arabia; nalgehainy@ut.edu.sa (N.A.A.); faltemani@ut.edu.sa (F.H.A.); m.alenezi@ut.edu.sa (M.A.A.)

<sup>2</sup> Department of Pharmacognosy, Faculty of Pharmacy, Misr University for Science & Technology (MUST), Giza 12566, Egypt; esraakadrymohamed@gmail.com

<sup>3</sup> Department of Therapeutic Chemistry, National Research Centre (NRC), El-Bouth St., Cairo 12622, Egypt; hanan\_abduallah@yahoo.com (H.F.A.); youniseman530@yahoo.com (E.A.Y.)

<sup>4</sup> Institute of Organic Chemistry, University of Würzburg, Am Hubland, 97074 Würzburg, Germany

<sup>5</sup> Department of Pharmacognosy, Faculty of Pharmacy, Deraya University, 7 Universities Zone, New Minia 61111, Egypt

<sup>6</sup> Department of Pharmacognosy, Faculty of Pharmacy, Beni-Suef University, Beni-Suef 62511, Egypt; abeer011150@pharm.bsu.edu.eg

\* Correspondence: bringman@chemie.uni-wuerzburg.de (G.B.); usama.ramadan@mu.edu.eg (U.R.A.)

## List of Contents

**Figure S1.** GC/MS spectrum for bovine femur bone fatty acids extract.

**Figure S2.** GC/MS spectrum for chicken femur bone fatty acids extract.

**Figure S3.** GC/MS spectrum for sheep femur bone fatty acids extract.

**Figure S4.** GC/MS spectrum for goat femur bone fatty acids extract.

**Figure S5.** Amino acid spectrum for bovine femur bone extract.

**Figure S6.** Amino acid spectrum for chicken femur bone extract.

**Figure S7.** Amino acid spectrum for sheep femur bone extract.

**Figure S8.** Amino acid spectrum for goat femur bone extract.

# *My GC-MS Report*

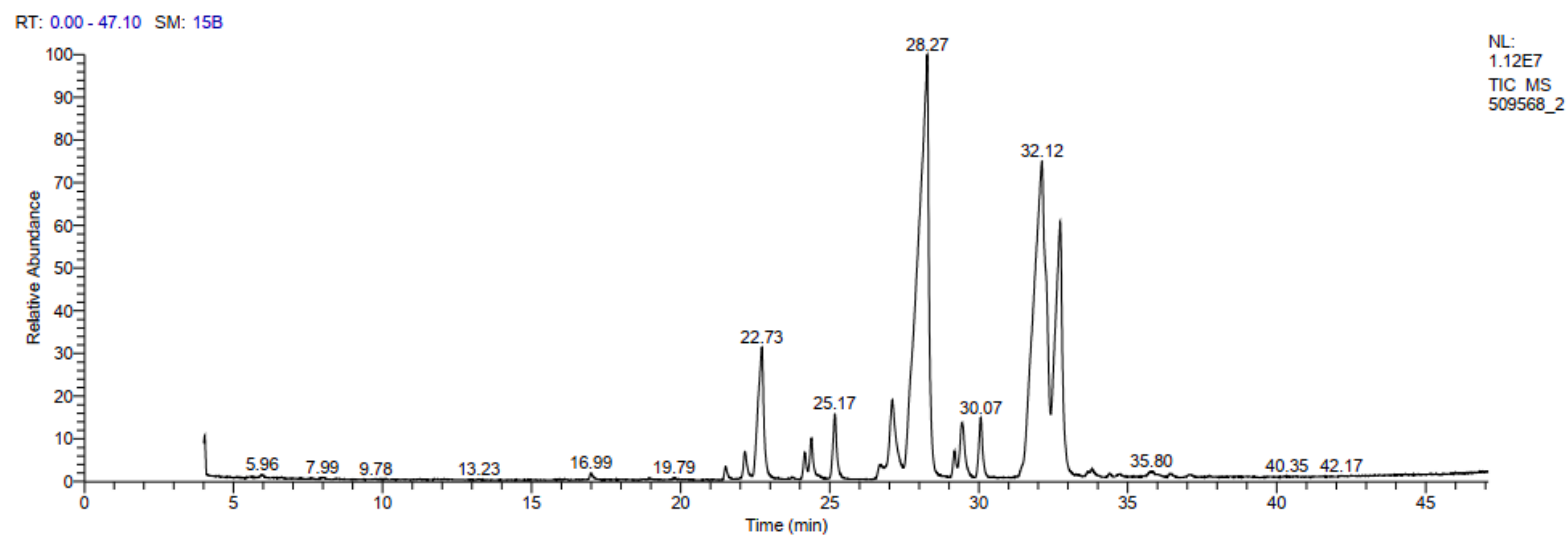

**Figure S1.** GC/MS spectrum for bovine femur bone fatty acids extract.

## *My GC-MS Report*

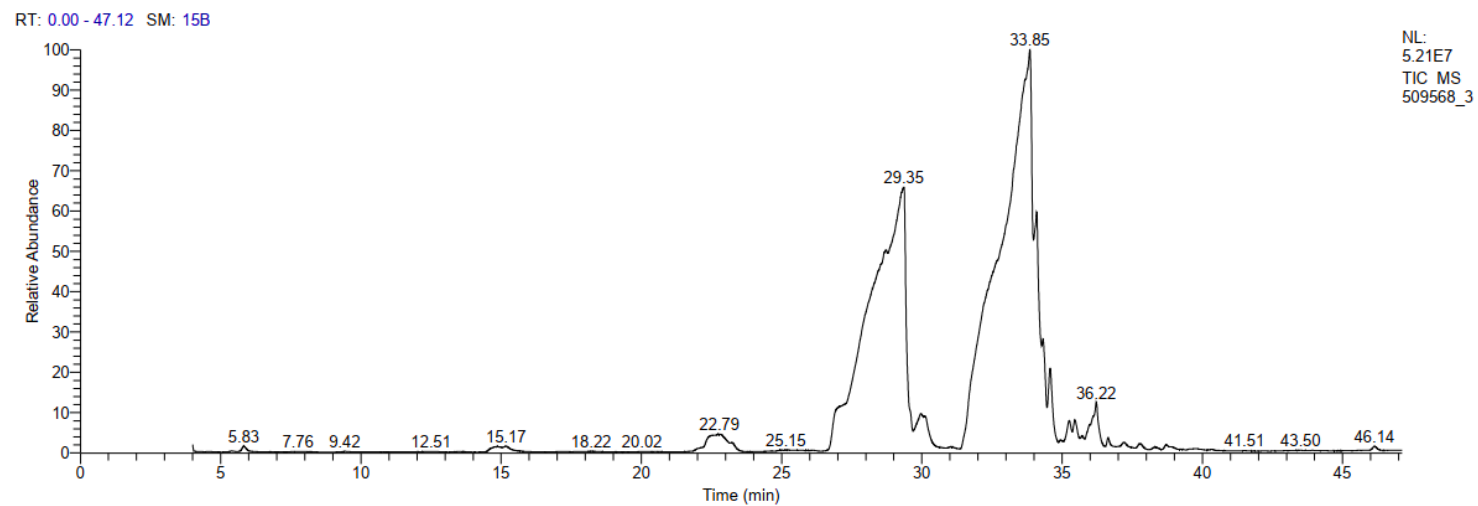

**Figure S2.** GC/MS spectrum for chicken femur bone fatty acids extract.

# *My GC-MS Report*

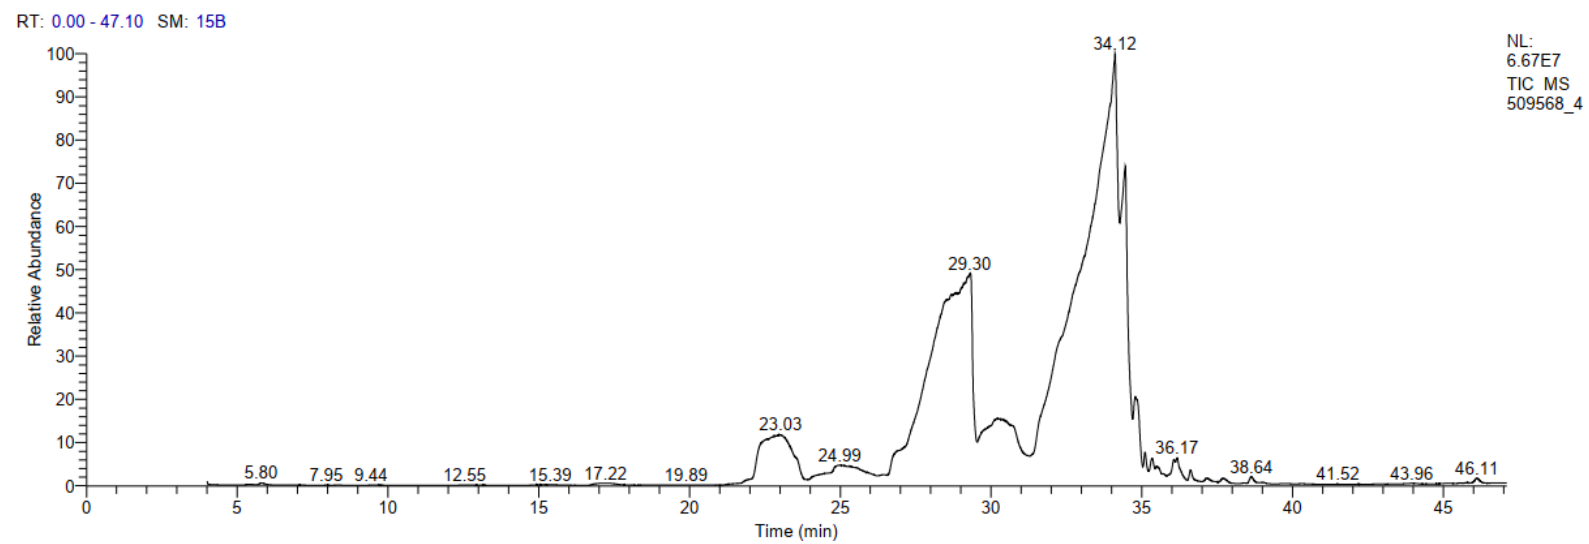

**Figure S3.** GC/MS spectrum for sheep femur bone fatty acids extract.

# *My GC-MS Report*

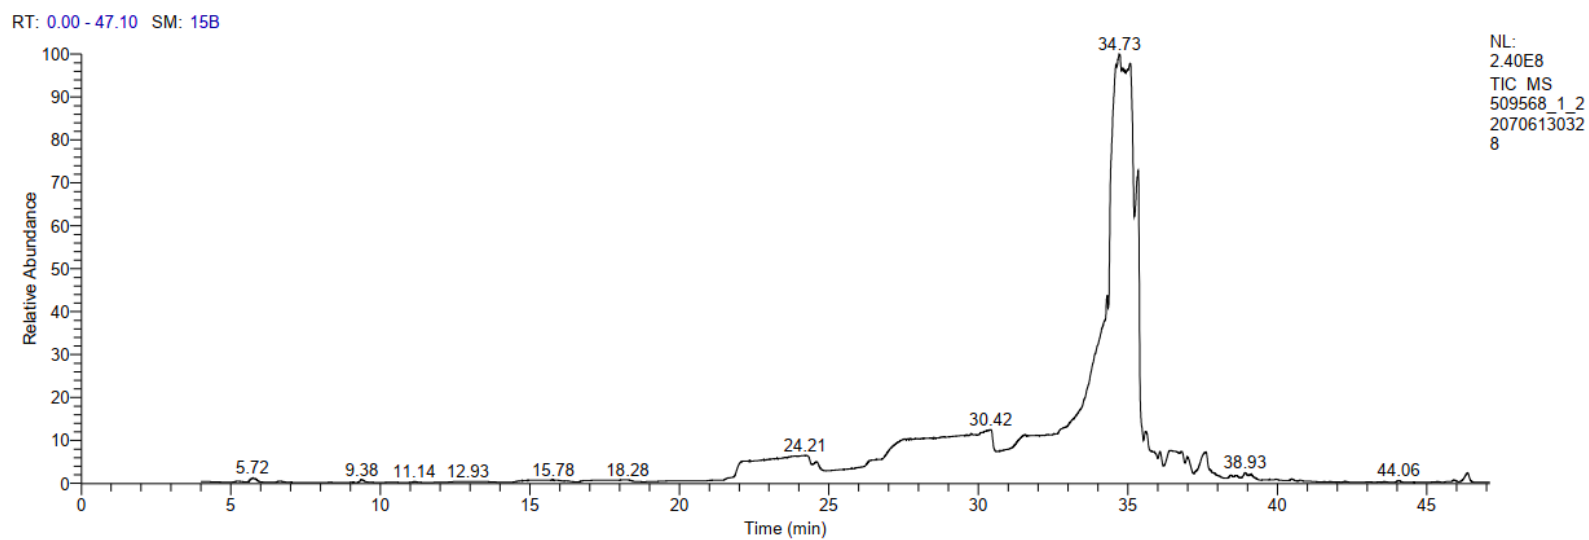

**Figure S4.** GC/MS spectrum for goat femur bone fatty acids extract.

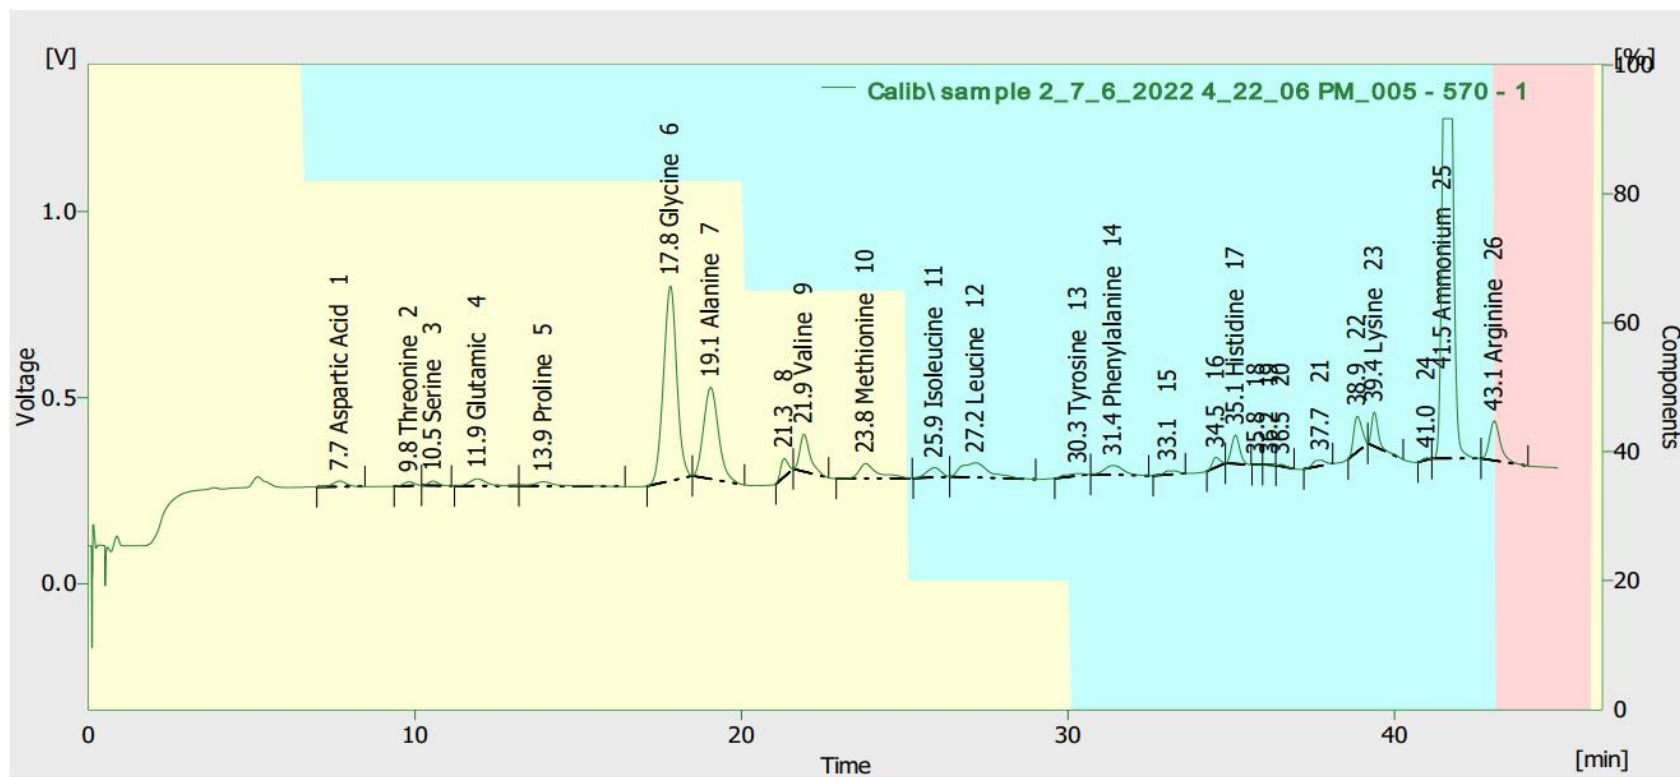

**Figure S5.** Amino acid spectrum for bovine femur bone extract.

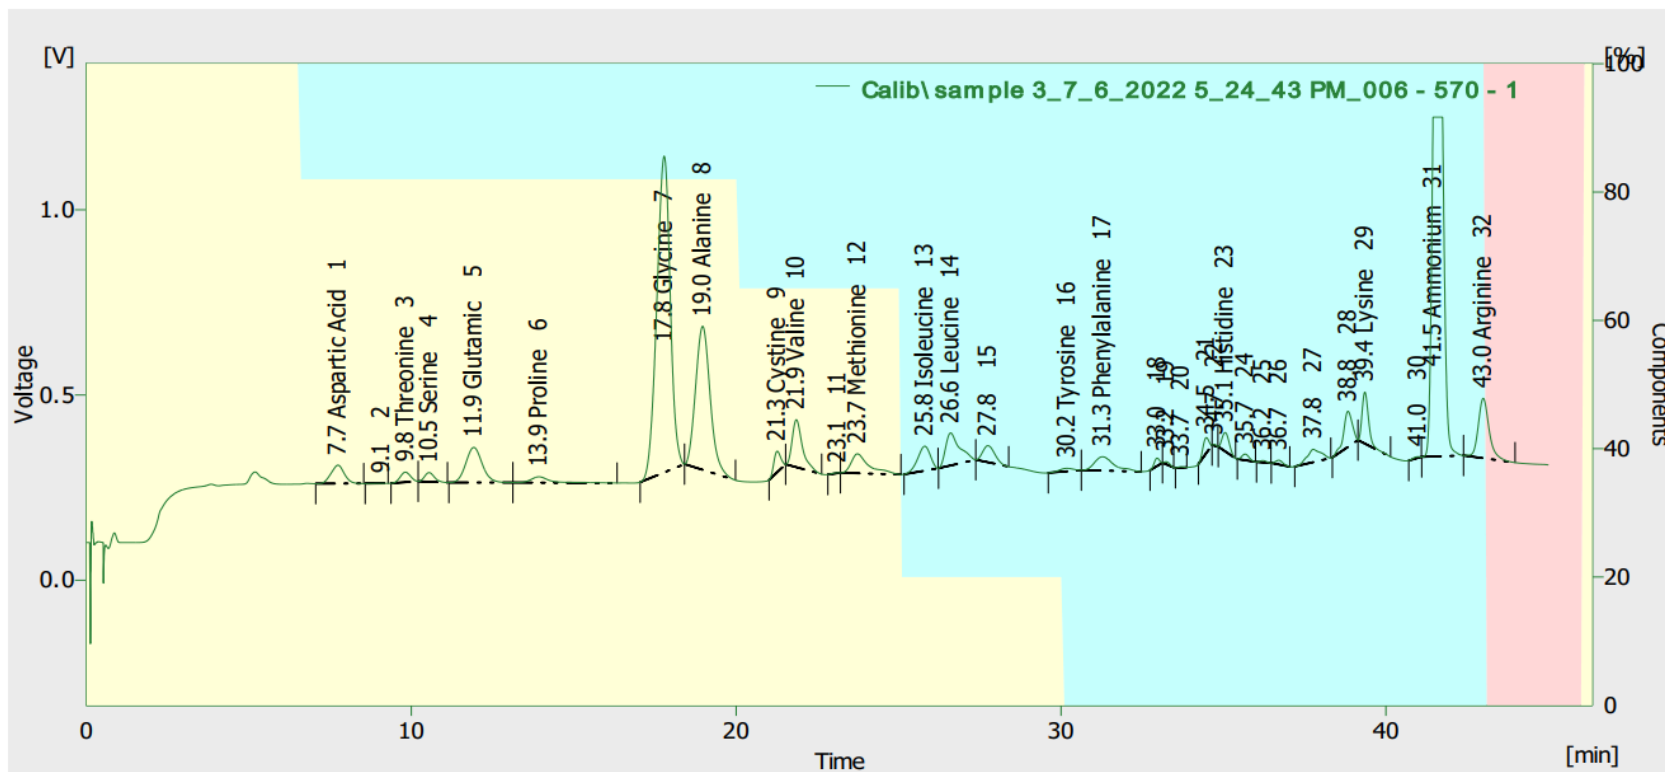

**Figure S6.** Amino acid spectrum for chicken femur bone extract.

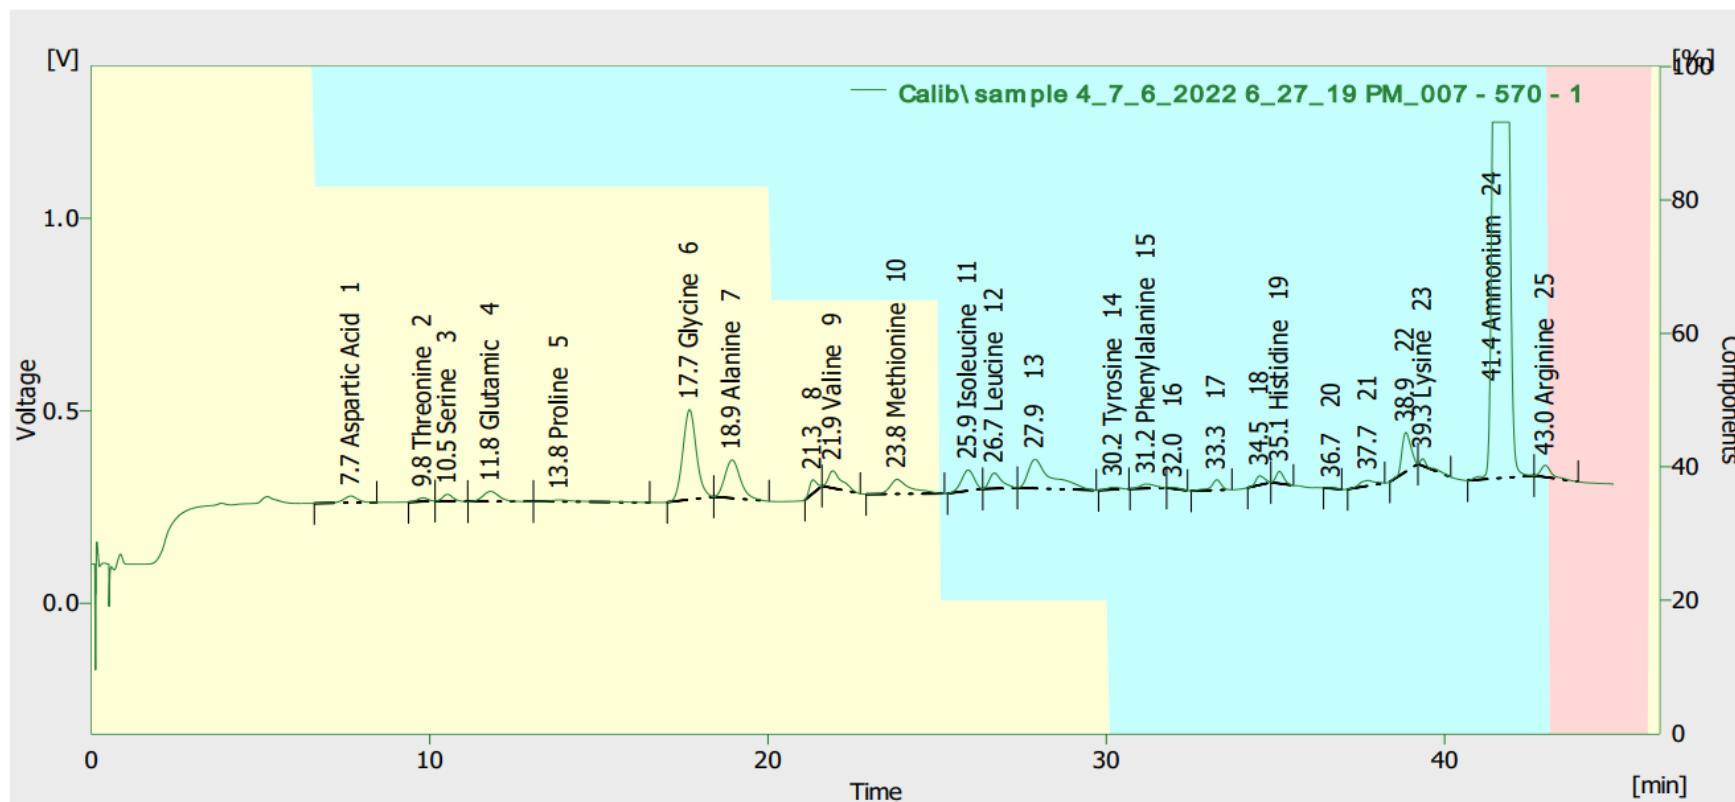

Figure S7. Amino acid spectrum for sheep femur bone extract.



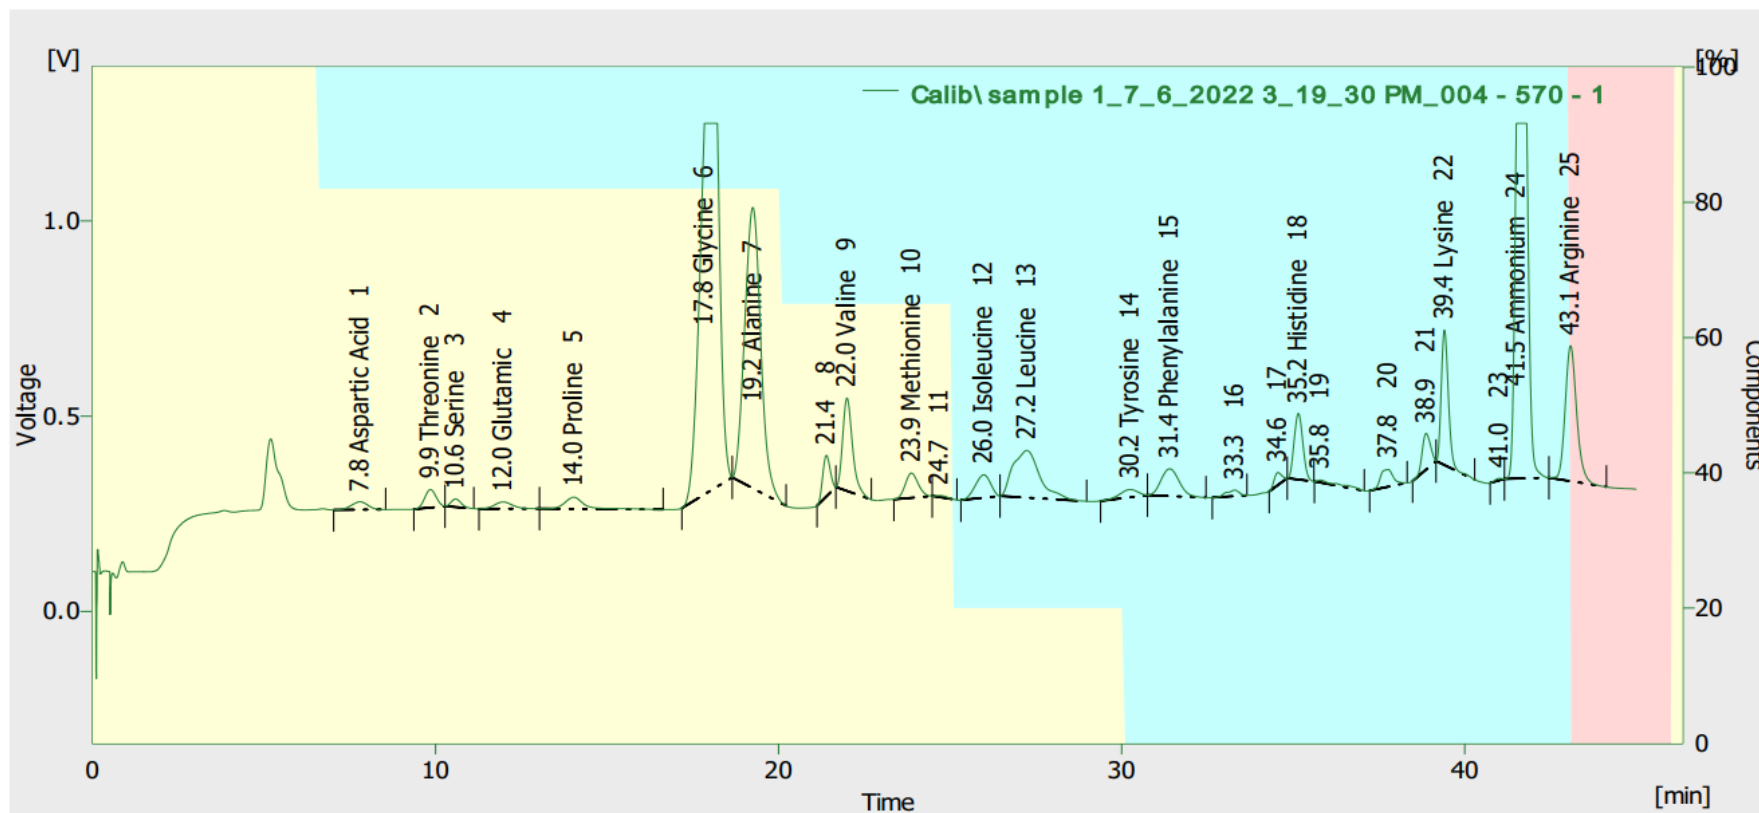

Figure S8. Amino acid spectrum for goat femur bone extract.
